# Supplementary material for: Remnant cholesterol is independently asssociated with an increased risk of peripheral artery disease in type 2 diabetic patients
Source: PubMed Central journal article supplement (PMC9974817; doi:10.3389/fendo.2023.1111152), 2023-02-15
Supplement: DataSheet_1.pdf [file DataSheet_1.pdf]

## *Supplementary Material*

### **Remnant Cholesterol Is Independently Associated with an Increased Risk of Peripheral Artery Disease in Type 2 Diabetic Patients**

Yi Song<sup>1</sup>, Ying Zhao<sup>2</sup>, Xiangli Bai<sup>3</sup>, Wenzhuo Cheng<sup>1</sup>, Li Wang<sup>1</sup>, Meng Shu<sup>1</sup>, Yan Shu<sup>1</sup>, Liyin Zhang<sup>1</sup>, Si Jin<sup>1\*</sup>

<sup>1</sup> Department of Endocrinology, Institute of Geriatric Medicine, Liyuan Hospital, Tongji Medical College, Huazhong University of Science and Technology, Wuhan, China.

<sup>2</sup> Geriatric Medicine Center, Key Laboratory of Endocrine Gland Diseases of Zhejiang Province, Department of Endocrinology, Zhejiang Provincial People's Hospital, Affiliated People's Hospital, Hangzhou Medical College, Hangzhou, China.

<sup>3</sup> Department of Laboratory Medicine, Liyuan Hospital, Tongji Medical College, Huazhong University of Science and Technology, Wuhan, China

**\*Correspondence:**

Si Jin, M.D, Ph.D., Professor

Department of Endocrinology, Institute of geriatric medicine, Liyuan Hospital, Tongji Medical College, Huazhong University of Science and Technology, 39 Lake Road, East Lake Ecological Scenic, Wuhan, Hubei Province, China.

Tel: 86-027-87543437 Fax: 86-027-87543437 Email: [Jinsi@hust.edu.cn](mailto:Jinsi@hust.edu.cn)

The severity of PAD was assessed using the Fontaine classification, comprising four stages: I - asymptomatic; II - intermittent claudication; III - rest pain; and IV - ischemic ulcers or gangrene (27).

We separated T2DM-PAD and T2DM-WPAD patients based on whether or not they were taking statins to determine whether statin use affected the RC levels. As shown in the Supplementary Table 1 and Table 2, there were no significant differences between the statin and non-statin subgroups in terms of RC. Comparing the PAD and WPAD groups of patients with LDL-C at target levels, a significant difference in RC levels was found. Elevated RC levels might explain the increased risk of PAD in DM patients with LDL-C at target. (See Supplementary Table 3)

Based on the Fontaine classification, we evaluated the degree of PAD disease and then categorized the patients with T2DM - PAD into three subgroups: Fontaine stage II, III, and IV. There was no significant correlation between RC and disease severity in any of the three patient groups.

#### **Supplementary Table 1. Baseline and laboratory findings of T2DM-WPAD patients with statins or without statins**

| Variables                 | Non-statins<br>(N=217) | Statins<br>(N=29) | <i>P</i> value |
|---------------------------|------------------------|-------------------|----------------|
| Gender (male, %)          | 121(55.8%)             | 14(48.3%)         | 0.447          |
| Age (years)               | 56±9                   | 57±10             | 0.153          |
| Diabetes duration (years) | 4(1-10)                | 5(2-10)           | 0.281          |
| Smoking, n (%)            | 64(29.5%)              | 5(17.2%)          | 0.168          |

|                                  |                          |                         |                  |
|----------------------------------|--------------------------|-------------------------|------------------|
| Alcohol, n (%)                   | 54(24.9%)                | 6(20.7%)                | 0.621            |
| Hypertension, n (%)              | <b>98(45.2%)</b>         | <b>22(75.9%)</b>        | <b>0.002</b>     |
| Dyslipidemia, n (%)              | <b>73(33.6%)</b>         | <b>17(58.6%)</b>        | <b>0.009</b>     |
| SBP (mmHg)                       | 128(117-140)             | 122(116-135)            | 0.153            |
| DBP (mmHg)                       | <b>80(72-87)</b>         | <b>77(68-82)</b>        | <b>0.016</b>     |
| ALT, U/L                         | 20.3(14.8-31.2)          | 20.9(14.3-26)           | 0.511            |
| AST, U/L                         | 20(16-25.3)              | 22.1(16.1-27.4)         | 0.565            |
| Urea, mmol/L                     | 5.54(4.48-6.36)          | 5.3(4.93-6.43)          | 0.395            |
| Cr, UMOL/L                       | 63.3(52.4-77.4)          | 56.8(46.1-74.4)         | 0.262            |
| eGFR(ml/min/1.73m <sup>2</sup> ) | 102.5(91.4-112.1)        | 99.7(91-106.7)          | 0.441            |
| Uric Acid, μmol/L                | 310.2±87.1               | 303±86.8                | 0.853            |
| CRP, mg/L                        | 1.2(0.7-2.4)             | 1.4(0.8-2.3)            | 0.939            |
| FPG, mmol/L                      | <b>10.56(7.55-14.95)</b> | <b>7.97(6.19-13.61)</b> | <b>0.015</b>     |
| HbA1c (%)                        | 8.3(6.8-10)              | 7.3(6.5-8.9)            | 0.112            |
| TG, mmol/L                       | 1.54(1.08-2.21)          | 1.6(1.08-2.2)           | 0.894            |
| TC, mmol/L                       | <b>4.62±1.06</b>         | <b>3.82±0.93</b>        | <b>&lt;0.001</b> |
| HDL-C, mmol/L                    | 1.12(0.97-1.38)          | 1.15(0.93-1.37)         | 0.836            |
| LDL-C, mmol/L                    | <b>2.97±0.98</b>         | <b>2.01±0.72</b>        | <b>&lt;0.001</b> |
| N-HDL-C, mmol/L                  | <b>3.52(2.88-4.15)</b>   | <b>2.54(2.25-3.17)</b>  | <b>&lt;0.001</b> |
| RC, mmol/L                       | 0.55(0.37-0.7)           | 0.57(0.52-0.87)         | 0.076            |
| TyG index                        | 7.89(7.27-8.48)          | 7.55(7.16-8.45)         | 0.169            |
| Neutrophil, 10 <sup>9</sup> /L   | 3.43(2.82-4.46)          | 3.39(3.01-4.27)         | 0.900            |
| Lymphocyte, 10 <sup>9</sup> /L   | 1.7(1.42-2.05)           | 1.65(1.38-1.88)         | 0.432            |
| Monocyte, 10 <sup>9</sup> /L     | 0.34(0.28-0.42)          | 0.37(0.27-0.4)          | 0.885            |
| Platelet, 10 <sup>9</sup> /L     | 207(176-242)             | 206(189-248)            | 0.708            |
| NLR                              | 2.05(1.59-2.53)          | 2.02(1.78-2.72)         | 0.672            |
| MLR                              | 0.19(0.16-0.25)          | 0.21(0.17-0.27)         | 0.391            |
| PHR                              | 176.53(143.06-237.76)    | 184.21(142.68-235.79)   | 0.649            |
| Use antidiabetes agents          |                          |                         |                  |
| Insulin, n (%)                   | 26(12%)                  | 1(3.4%)                 | 0.198            |
| Oral drugs, n (%)                | 100(46%)                 | 11(37.9%)               |                  |
| Diet control only, n (%)         | 62(28.6%)                | 10(34.5%)               |                  |
| Insulin + Drugs, n (%)           | 29(13.4%)                | 7(24%)                  |                  |

SBP, systolic blood pressure; DBP, diastolic blood pressure; ALT, alanine aminotransferase; AST, aspartate aminotransferase; Cr, creatinine; eGFR, estimated glomerular filtration rate; CRP, C-reactive protein; FPG, fasting plasma glucose; HbA1c, glycosylated hemoglobin; TG, triglyceride; TC, total cholesterol; HDL-C, high-density lipoprotein cholesterol; LDL-C, low-density lipoprotein cholesterol; N-HDL-C, non-HDL-C; RC, remnant cholesterol; TyG index, triglyceride glucose index; NLR, neutrophil to lymphocyte ratio; MLR, monocyte to lymphocyte ratio; PHR, platelet/HDL-C ratio.  $P < 0.05$  (two-sided) was defined as statistically significant. Bold values indicate statistical significance.

**Supplementary Table2. Baseline and laboratory findings of T2DM-PAD patients with statins or without statins**

| Variables                        | Non-statins<br>(N=215) | Statins<br>(N=55)      | P value          |
|----------------------------------|------------------------|------------------------|------------------|
| Gender (male, %)                 | 128(59.5%)             | 28(50.9%)              | 0.248            |
| Age (years)                      | 65(59-71)              | 66(61-69.5)            | 0.756            |
| Diabetes duration (years)        | 10(5-18)               | 10(5-18.5)             | 0.922            |
| Smoking, n (%)                   | 61(28.4%)              | 12(21.8%)              | 0.329            |
| Alcohol, n (%)                   | 57(26.5%)              | 11(20%)                | 0.321            |
| Hypertension, n (%)              | <b>126(58.6%)</b>      | <b>41(74.5%)</b>       | <b>0.030</b>     |
| Dyslipidemia, n (%)              | <b>67(31.2%)</b>       | <b>25(45.5%)</b>       | <b>0.046</b>     |
| SBP (mmHg)                       | 133(123-144.5)         | 130(122-142.5)         | 0.392            |
| DBP (mmHg)                       | 78(70-85)              | 76(70-81)              | 0.143            |
| ALT, U/L                         | 16.6(11.6-22.15)       | 19.1(14.6-27.25)       | 0.093            |
| AST, U/L                         | 18(15.65-24.2)         | 20.7(16.95-25.95)      | 0.087            |
| Urea, mmol/L                     | 5.93(4.51-7.22)        | 5.83(4.86-7.15)        | 0.718            |
| Cr, UMOL/L                       | 70.2(56.3-86)          | 71.1(59.7-78.3)        | 0.965            |
| eGFR(ml/min/1.73m <sup>2</sup> ) | 90.9(72.35-104.2)      | 92.8(71.2-101.3)       | 0.941            |
| Uric Acid, μmol/L                | 316.3(243.95-380.2)    | 324.6(275-372.65)      | 0.670            |
| CRP, mg/L                        | 2.2(1.1-6.15)          | 1.9(1-4.5)             | 0.255            |
| FPG, mmol/L                      | 10.1(8-15.1)           | 9.59(6.59-13.64)       | 0.131            |
| HbA1c (%)                        | 8.3(7.2-9.95)          | 8.1(7.1-9.3)           | 0.490            |
| TG, mmol/L                       | 1.66(1.14-2.36)        | 1.66(1.135-2.505)      | 0.886            |
| TC, mmol/L                       | <b>4.68(3.84-5.52)</b> | <b>3.82(3.39-4.63)</b> | <b>&lt;0.001</b> |
| HDL-C, mmol/L                    | 1(0.86-1.16)           | 1(0.865-1.15)          | 0.964            |
| LDL-C, mmol/L                    | <b>2.72(2.1-3.49)</b>  | <b>1.98(1.69-2.47)</b> | <b>&lt;0.001</b> |
| N-HDL-C, mmol/L                  | <b>3.58(2.8-4.4)</b>   | <b>2.73(2.26-3.55)</b> | <b>&lt;0.001</b> |
| RC, mmol/L                       | 0.76(0.61-1.05)        | 0.75(0.56-0.99)        | 0.487            |
| TyG index                        | 7.96(7.38-8.5)         | 7.85(7.175-8.35)       | 0.296            |
| Neutrophil, 10 <sup>9</sup> /L   | 3.99(3.09-5.13)        | 3.91(3.32-5.04)        | 0.895            |
| Lymphocyte, 10 <sup>9</sup> /L   | 1.44(1.12-1.81)        | 1.58(1.26-1.88)        | 0.154            |
| Monocyte, 10 <sup>9</sup> /L     | 0.38(0.3-0.49)         | 0.4(0.3-0.52)          | 0.643            |
| Platelet, 10 <sup>9</sup> /L     | 212(172-260)           | 195(169-243)           | 0.275            |
| NLR                              | 2.66(1.96-3.75)        | 2.55(1.785-3.56)       | 0.311            |
| MLR                              | 0.26(0.19-0.36)        | 0.24(0.19-0.33)        | 0.497            |
| PHR                              | 204.11(163.25-276.29)  | 201(152.75-271.76)     | 0.746            |
| Use antidiabetes agents          |                        |                        |                  |
| Insulin, n (%)                   | 51(23.7%) a            | 8(14.5%) a             |                  |
| Oral drugs, n (%)                | 98(45.6%) a            | 18(32.7%) a            |                  |

|                          |                    |                    |              |
|--------------------------|--------------------|--------------------|--------------|
| Diet control only, n (%) | 18(8.4%) a         | 5(9.1%) a          |              |
| Insulin + Drugs, n (%)   | <b>48(22.3%) a</b> | <b>24(43.6%) b</b> | <b>0.013</b> |
| PAD                      |                    |                    |              |
| Mild PAD, n (%)          | 108(50.2%)         | 29(52.7%)          | 0.806        |
| Moderate PAD, n (%)      | 52(24.2%)          | 11(20.0%)          |              |
| Severe PAD, n (%)        | 55(25.6%)          | 15(27.3%)          |              |

SBP, systolic blood pressure; DBP, diastolic blood pressure; ALT, alanine aminotransferase; AST, aspartate aminotransferase; Cr, creatinine; eGFR, estimated glomerular filtration rate; CRP, C-reactive protein; FPG, fasting plasma glucose; HbA1c, glycosylated hemoglobin; TG, triglyceride; TC, total cholesterol; HDL-C, high-density lipoprotein cholesterol; LDL-C, low-density lipoprotein cholesterol; N-HDL-C, non-HDL-C; RC, remnant cholesterol; TyG index, triglyceride glucose index; NLR, neutrophil to lymphocyte ratio; MLR, monocyte to lymphocyte ratio; PHR, platelet/HDL-C ratio.  $P < 0.05$  (two-sided) was defined as statistically significant. Bold values indicate statistical significance. a, b: after applying the chi-square test, different superscripts indicate statistically different categorical variables between the 2 groups.

**Supplementary Table 3. Demographic and clinical data of WPAD and PAD patients with LDL level < 1.8 mmol/L**

| Variables                        | WPAD<br>(N=38)          | PAD<br>(N=57)          | P value          |
|----------------------------------|-------------------------|------------------------|------------------|
| Gender (male, %)                 | 24(63.2%)               | 37(64.9%)              | 0.861            |
| Age (years)                      | <b>57.5(52-64)</b>      | <b>65(59-71)</b>       | <b>&lt;0.001</b> |
| Diabetes duration (years)        | <b>6.5(2-10)</b>        | <b>14(4-20)</b>        | <b>0.002</b>     |
| Smoking, n (%)                   | 11(28.9%)               | 13(22.8%)              | 0.500            |
| Alcohol, n (%)                   | 13(34.2%)               | 14(24.6%)              | 0.307            |
| Hypertension, n (%)              | 22(57.9%)               | 37(64.9%)              | 0.490            |
| Dyslipidemia, n (%)              | 11(28.9%)               | 15(26.3%)              | 0.778            |
| Statins                          | 9(23.7%)                | 19(33.3%)              | 0.312            |
| SBP (mmHg)                       | 127(119-142)            | 132(122-140)           | 0.494            |
| DBP (mmHg)                       | 79(72-85)               | 78(72-82)              | 0.270            |
| ALT, U/L                         | 21.15(14-30.9)          | 19.1(13.1-29.4)        | 0.310            |
| AST, U/L                         | 20.1(16.7-25.5)         | 18.8(16-26.9)          | 0.679            |
| Urea, mmol/L                     | 5.955(4.86-7.6)         | 6.04(4.53-7.57)        | 0.939            |
| Cr, UMOL/L                       | <b>67.75(49.9-83.7)</b> | <b>76.9(65.5-91.2)</b> | <b>0.013</b>     |
| eGFR(ml/min/1.73m <sup>2</sup> ) | <b>98.35(91-106.7)</b>  | <b>86.1(68.5-99.4)</b> | <b>0.005</b>     |
| Uric Acid, μmol/L                | 305.7(246.9-377.2)      | 334.3(287.2-373.9)     | 0.085            |
| CRP, mg/L                        | 1.4(0.6-2.7)            | 2(1-6.3)               | 0.063            |
| FPG, mmol/L                      | 10.615(6.56-15)         | 8.46(6.36-12.16)       | 0.277            |
| HbA1c (%)                        | 7.45(6.7-8.9)           | 7.6(6.7-9.1)           | 0.779            |
| TG, mmol/L                       | 1.155(0.71-2.19)        | 1.21(0.82-1.81)        | 0.979            |
| TC, mmol/L                       | 3.12(2.75-3.52)         | 3.21(2.95-3.37)        | 0.403            |

|                                |                        |                        |              |
|--------------------------------|------------------------|------------------------|--------------|
| HDL-C, mmol/L                  | <b>1.02(0.8-1.34)</b>  | <b>0.9(0.73-1.06)</b>  | <b>0.028</b> |
| LDL-C, mmol/L                  | <b>1.43(1.26-1.57)</b> | <b>1.56(1.36-1.67)</b> | <b>0.030</b> |
| N-HDL-C, mmol/L                | <b>2.08(1.78-2.31)</b> | <b>2.24(2.05-2.44)</b> | <b>0.037</b> |
| RC, mmol/L                     | <b>0.51(0.42-0.7)</b>  | <b>0.73(0.55-0.9)</b>  | <b>0.002</b> |
| TyG index                      | 7.64(6.97-8.16)        | 7.34(7.07-8.31)        | 0.514        |
| Neutrophil ,10 <sup>9</sup> /L | 3.94(2.77-4.67)        | 4.07(3.02-5.22)        | 0.511        |
| Lymphocyte, 10 <sup>9</sup> /L | <b>1.76(1.37-1.91)</b> | <b>1.36(1.05-1.73)</b> | <b>0.015</b> |
| Monocyte, 10 <sup>9</sup> /L   | 0.375(0.29-0.46)       | 0.41(0.29-0.54)        | 0.185        |
| Platelet, 10 <sup>9</sup> /L   | 203(177-231)           | 195(160-258)           | 0.802        |
| NLR                            | <b>2.17(1.52-3.12)</b> | <b>2.75(1.86-3.78)</b> | <b>0.043</b> |
| MLR                            | <b>0.2(0.16-0.28)</b>  | <b>0.27(0.21-0.38)</b> | <b>0.005</b> |
| PHR                            | 186.39(154.55-265.52)  | 226.85(170-310.71)     | 0.117        |
| Use antidiabetes agents        |                        |                        |              |
| Insulin, n (%)                 | 9(23.7%)               | 22(38.6%)              | 0.096        |
| Oral drugs, n (%)              | 12(31.6%)              | 13(22.8%)              |              |
| Diet control only, n (%)       | 7(18.4%)               | 3(5.3%)                |              |
| Insulin + Drugs, n (%)         | 10(26.3%)              | 19(33.3%)              |              |
| PAD                            |                        |                        |              |
| Mild PAD, n (%)                | /                      | 27(47.4%)              | /            |
| Moderate PAD, n (%)            | /                      | 14(24.6%)              | /            |
| Severe PAD, n (%)              | /                      | 16(28.1%)              | /            |

SBP, systolic blood pressure; DBP, diastolic blood pressure; ALT, alanine aminotransferase; AST, aspartate aminotransferase; Cr, creatinine; eGFR, estimated glomerular filtration rate; CRP, C-reactive protein; FPG, fasting plasma glucose; HbA1c, glycosylated hemoglobin; TG, triglyceride; TC, total cholesterol; HDL-C, high-density lipoprotein cholesterol; LDL-C, low-density lipoprotein cholesterol; N-HDL-C, non-HDL-C; RC, remnant cholesterol; TyG index, triglyceride glucose index; NLR, neutrophil to lymphocyte ratio; MLR, monocyte to lymphocyte ratio; PHR, platelet/HDL-C ratio.  $P < 0.05$  (two-sided) was defined as statistically significant. Bold values indicate statistical significance.

**Supplementary Figure1. RC level according to PAD severity based on the Fontaine classification.**

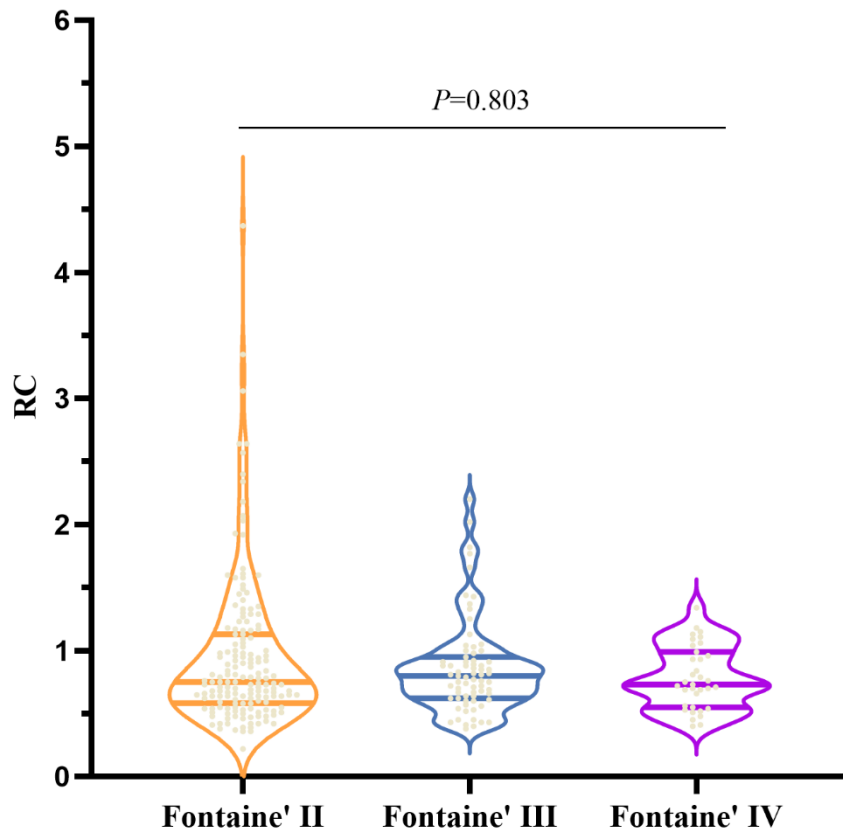

RC, remnant cholesterol. In the violin plot, the three horizontal lines from top to bottom represent the upper quartile, the median, and the lower quartile in order.  $P < 0.05$  (two-sided) was defined as statistically significant. Bold values indicate statistical significance.
